# Supplementary material
Source: PubMed Central journal article supplement (PMC7581279)
Supplement: NIHMS1633088-supplement-Supporting_info.pdf [file NIHMS1633088-supplement-Supporting_info.pdf]

# 6-(1-Benzyl-1*H*-pyrrol-2-yl)-2,4-dioxo-5-hexenoic Acids as Dual Inhibitors of HIV-1 Integrase and Reverse Transcriptase Ribonuclease H Domain, Synthesized by a Parallel Synthesis Approach

*Roberta Costi,<sup>\*,#,†</sup> Mathieu Métifiot,<sup>#,‡</sup> Francesca Esposito,<sup>†</sup> Giuliana Cuzzucoli Crucitti,<sup>†</sup> Luca Pescatori,<sup>†</sup> Antonella Messori,<sup>†</sup> Luigi Scipione,<sup>†</sup> Silvano Tortorella,<sup>†</sup> Luca Zinzula,<sup>†</sup> Ettore Novellino,<sup>§</sup> Yves Pommier,<sup>‡</sup> Enzo Tramontano,<sup>†</sup> Christophe Marchand,<sup>\*,‡</sup> and Roberto Di Santo<sup>†</sup>*

<sup>†</sup>Dipartimento di Chimica e Tecnologie del Farmaco, Istituto Pasteur-Fondazione Cenci Bolognetti, “Sapienza” Università di Roma, Italy, <sup>‡</sup>Laboratory of Molecular Pharmacology, Center for Cancer Research, National Cancer Institute, National Institutes of Health, Building 37, Room 5068, Bethesda, Maryland 20892-4255, <sup>†</sup>Department of Life and Environmental Sciences, University of Cagliari, Italy, <sup>§</sup>Dipartimento di Farmacia, Università di Napoli “Federico II”, Via D. Montesano 49, I-80131 Napoli, Italy

## Contents:

Pages 2-3: Spectroscopic data of representative compounds within the derivatives **9a-y** and **10a-y**;

Pages 3-5: Table 1: chemical, physical and analytical data of derivatives **9a-y** and **10a-y**.

Pages 5-9: Analysis of derivatives **7a-y** and **8a-y**.

## 1. Spectroscopic data

**1-[(4-Methylphenyl)methyl]pyrrole-2-carboxaldehyde (9d).** White solid; IR  $\nu$  1652 (C=O)  $\text{cm}^{-1}$ ;  $^1\text{H}$  NMR ( $\text{CDCl}_3$ )  $\delta$  2.36 (s, 3H,  $\text{CH}_3$ ), 5.67 (s, 2H,  $\text{CH}_2$ ), 6.30 (m, 1H, pyrrole  $\beta$ -proton), 6.98-7.02 (m, 3H, pyrrole  $\beta$ -proton and benzene H), 7.08-7.19 (m, 3H, pyrrole  $\alpha$ -proton and benzene H), 9.60 (s, 1H, aldehyde CH).

**1-[(2-Fluorophenyl)methyl]pyrrole-2-carboxaldehyde (9e).** White solid; IR  $\nu$  1650 (C=O)  $\text{cm}^{-1}$ ;  $^1\text{H}$  NMR ( $\text{CDCl}_3$ )  $\delta$  5.67 (s, 2H,  $\text{CH}_2$ ), 6.32 (m, 1H, pyrrole  $\beta$ -proton), 7.01 (m, 1H, pyrrole  $\beta$ -proton), 7.09-7.14 (m, 4H, benzene H), 7.30 (m, 1H, pyrrole  $\alpha$ -proton), 9.60 (s, 1H, aldehyde CH).

**3-[(2-Formyl-1*H*-pyrrol-1-yl)methyl]benzonitrile (9k).** White solid; IR  $\nu$  2224 (CN), 1656 (C=O)  $\text{cm}^{-1}$ ;  $^1\text{H}$  NMR ( $\text{CDCl}_3$ )  $\delta$  5.64 (s, 2H,  $\text{CH}_2$ ), 6.40 (m, 1H, pyrrole  $\beta$ -proton), 7.07-7.08 (m, 2H, pyrrole  $\beta$ -proton and benzene H), 7.39-7.50 (m, 3H, benzene H), 7.61 (m, 1H, pyrrole  $\alpha$ -proton), 9.60 (s, 1H, aldehyde CH).

**1-[(2,3-Difluorophenyl)methyl]pyrrole-2-carboxaldehyde (9q).** Brown oil; IR  $\nu$  1655 (C=O)  $\text{cm}^{-1}$ ;  $^1\text{H}$  NMR ( $\text{CDCl}_3$ )  $\delta$  5.71 (s, 2H,  $\text{CH}_2$ ), 6.35 (m, 1H, pyrrole  $\beta$ -proton), 6.89 (m, 1H, pyrrole  $\beta$ -proton), 7.02-7.15 (m, 4H, pyrrole  $\alpha$ -proton and benzene H), 9.62 (s, 1H, aldehyde CH).

**1-[(3,4-Difluorophenyl)methyl]pyrrole-2-carboxaldehyde (9u).** Yellow solid; IR  $\nu$  1650 (C=O)  $\text{cm}^{-1}$ ;  $^1\text{H}$  NMR ( $\text{CDCl}_3$ )  $\delta$  5.56 (s, 2H,  $\text{CH}_2$ ), 6.36 (m, 1H, pyrrole  $\beta$ -proton), 6.93-7.05 (m, 4H, pyrrole  $\beta$ -proton, pyrrole  $\alpha$ -proton and benzene H), 7.18 (m, 1H, benzene H), 9.60 (s, 1H, aldehyde CH).

**4-[2-Formyl-1-[(4-methylphenyl)methyl]-1*H*-pyrrol-2-yl]-3-buten-2-one (10d).** Yellow oil; IR  $\nu$  1660 (C=O)  $\text{cm}^{-1}$ ;  $^1\text{H}$  NMR ( $\text{CDCl}_3$ )  $\delta$  2.25 (s, 3H,  $\text{CH}_3$ ), 2.36 (s, 3H,  $\text{CH}_3$ ), 5.22 (s, 2H,  $\text{CH}_2$ ), 6.30 (m, 1H, pyrrole  $\beta$ -proton), 6.50 (d, 1H,  $J_t = 15.7$  Hz, butenoate C4-H), 6.80 (m, 1H, pyrrole  $\beta$ -proton), 6.91

(m, 1H, pyrrole  $\alpha$ -proton), 6.99 (d, 1H, benzene H), 7.17 (d, 1H, benzene H), 7.45 (d, 1H,  $J_t = 15.7$  Hz, butenoate C3-H).

**3-[[2-(3-Oxo-1-propen-1-yl)-1H-pyrrol-1-yl]methyl]benzonitrile (10k).** Orange oil; IR  $\nu$  2230 (CN), 1659 (C=O)  $\text{cm}^{-1}$ ;  $^1\text{H}$  NMR ( $\text{CDCl}_3$ )  $\delta$  2.27 (s, 1H,  $\text{CH}_3$ ), 5.31 (s, 2H,  $\text{CH}_2$ ), 6.37 (m, 1H, pyrrole  $\beta$ -proton), 6.54 (d, 1H,  $J_t = 15.6$  Hz, butenoate C4-H), 6.85 (m, 1H, pyrrole  $\beta$ -proton), 6.92 (m, 1H, pyrrole  $\alpha$ -proton), 7.26 (s, 1H, benzene H), 7.30-7.36 (m, 2H, benzene H and butenoate C3-H), 7.49 (t, 1H, benzene H), 7.62 (d, 1H, benzene H).

**4-[2-Formyl-1-[(2,3-difluorophenyl)methyl]-1H-pyrrol-2-yl]-3-buten-2-one (10q).** Yellow oil; IR  $\nu$  1659 (C=O)  $\text{cm}^{-1}$ ;  $^1\text{H}$  NMR ( $\text{CDCl}_3$ )  $\delta$  2.31 (s, 3H,  $\text{CH}_3$ ), 5.34 (s, 2H,  $\text{CH}_2$ ), 6.34 (m, 1H, pyrrole  $\beta$ -proton), 6.52-6.61 (m, 2H, pyrrole  $\beta$ -proton and butenoate C4-H), 6.83 (m, 1H, pyrrole  $\alpha$ -proton), 6.96 (m, 1H, benzene H), 7.06 (m, 1H, benzene H), 7.15 (m, 1H, benzene H), 7.45 (d, 1H,  $J_t = 15.7$  Hz, butenoate C3-H).

**4-[2-Formyl-1-[(3,4-difluorophenyl)methyl]-1H-pyrrol-2-yl]-3-buten-2-one (10u).** Yellow oil; IR  $\nu$  1660 (C=O)  $\text{cm}^{-1}$ ;  $^1\text{H}$  NMR ( $\text{CDCl}_3$ )  $\delta$  2.27 (s, 3H,  $\text{CH}_3$ ), 5.23 (s, 2H,  $\text{CH}_2$ ), 6.34 (m, 1H, pyrrole  $\beta$ -proton), 6.53 (d, 1H,  $J_t = 15.8$  Hz, butenoate C4-H), 6.83-6.86 (m, 3H, pyrrole  $\beta$ -proton and benzene H), 6.91 (m, 1H, pyrrole  $\alpha$ -proton), 7.16 (m, 1H, benzene H), 7.38 (d, 1H,  $J_t = 15.8$  Hz, butenoate C3-H).

## 2. Table 1. Chemical, Physical and Analytical Data of Derivatives **9a-y** and **10a-y**.

| Cpd       | R <sub>2</sub> | R <sub>3</sub> | R <sub>4</sub> | R <sub>5</sub> | R <sub>6</sub> | mp ( $^{\circ}\text{C}$ ) | recryst solvent <sup>a</sup> | Yield (%) |
|-----------|----------------|----------------|----------------|----------------|----------------|---------------------------|------------------------------|-----------|
| <b>9a</b> | H              | H              | H              | H              | H              | oil                       | oil                          | 76        |
| <b>9b</b> | $\text{CH}_3$  | H              | H              | H              | H              | 38-40                     | b                            | 100       |
| <b>9c</b> | H              | $\text{CH}_3$  | H              | H              | H              | oil                       | oil                          | 82        |
| <b>9d</b> | H              | H              | $\text{CH}_3$  | H              | H              | 49-51                     | b                            | 86        |

|            |                                |                 |                  |                 |    |         |     |     |
|------------|--------------------------------|-----------------|------------------|-----------------|----|---------|-----|-----|
| <b>9e</b>  | F                              | H               | H                | H               | H  | 34-36   | b   | 100 |
| <b>9f</b>  | H                              | F               | H                | H               | H  | oil     | oil | 100 |
| <b>9g</b>  | H                              | H               | F                | H               | H  | oil     | oil | 65  |
| <b>9h</b>  | H                              | Cl              | H                | H               | H  | oil     | oil | 100 |
| <b>9i</b>  | H                              | H               | Cl               | H               | H  | 78-80   | b   | 96  |
| <b>9j</b>  | CN                             | H               | H                | H               | H  | 138-140 |     | 85  |
| <b>9k</b>  | H                              | CN              | H                | H               | H  | 98-100  | c   | 70  |
| <b>9l</b>  | H                              | H               | CN               | H               | H  | -       | -   | 100 |
| <b>9m</b>  | OCH <sub>3</sub>               | H               | H                | H               | H  | 56-58   | b   | 100 |
| <b>9n</b>  | H                              | H               | OCH <sub>3</sub> | H               | H  | oil     | oil | 77  |
| <b>9o</b>  | OC <sub>2</sub> H <sub>5</sub> | H               | H                | H               | H  | oil     | oil | 71  |
| <b>9p</b>  | H                              | CH <sub>3</sub> | H                | CH <sub>3</sub> | H  | oil     | oil | 52  |
| <b>9q</b>  | F                              | F               | H                | H               | H  | oil     | oil | 71  |
| <b>9r</b>  | F                              | H               | F                | H               | H  | 40-41   | b   | 100 |
| <b>9s</b>  | F                              | H               | H                | F               | H  | 50-52   | b   | 87  |
| <b>9t</b>  | F                              | H               | H                | H               | F  | oil     | oil | 87  |
| <b>9u</b>  | H                              | F               | F                | H               | H  | 47-49   | b   | 69  |
| <b>9v</b>  | H                              | F               | H                | F               | H  | 56-58   | b   | 100 |
| <b>9w</b>  | Cl                             | H               | Cl               | H               | H  | 75-77   | c   | 100 |
| <b>9x</b>  | Cl                             | H               | H                | H               | Cl | 70-72   | b   | 72  |
| <b>9y</b>  | H                              | Cl              | H                | Cl              | H  | 61-63   | b   | 100 |
| <b>10a</b> | H                              | H               | H                | H               | H  | oil     | oil | 100 |
| <b>10b</b> | CH <sub>3</sub>                | H               | H                | H               | H  | 76-77   | a   | 58  |
| <b>10c</b> | H                              | CH <sub>3</sub> | H                | H               | H  | 65-67   | a   | 81  |
| <b>10d</b> | H                              | H               | CH <sub>3</sub>  | H               | H  | oil     | oil | 87  |
| <b>10e</b> | F                              | H               | H                | H               | H  | 46-47   | a   | 92  |
| <b>10f</b> | H                              | F               | H                | H               | H  | oil     | oil | 69  |
| <b>10g</b> | H                              | H               | F                | H               | H  | oil     | oil | 83  |
| <b>10h</b> | H                              | Cl              | H                | H               | H  | 78-80   | a   | 63  |

|            |                                |                 |                  |                 |    |         |     |     |
|------------|--------------------------------|-----------------|------------------|-----------------|----|---------|-----|-----|
| <b>10i</b> | H                              | H               | Cl               | H               | H  | oil     | oil | 100 |
| <b>10j</b> | CN                             | H               | H                | H               | H  | 87-89   | c   | 75  |
| <b>10k</b> | H                              | CN              | H                | H               | H  | oil     | oil | 68  |
| <b>10l</b> | H                              | H               | CN               | H               | H  | 95-98   | c   | 32  |
| <b>10m</b> | OCH <sub>3</sub>               | H               | H                | H               | H  | 120-122 | a   | 37  |
| <b>10n</b> | H                              | H               | OCH <sub>3</sub> | H               | H  | oil     | oil | 100 |
| <b>10o</b> | OC <sub>2</sub> H <sub>5</sub> | H               | H                | H               | H  | 81-82   | a   | 47  |
| <b>10p</b> | H                              | CH <sub>3</sub> | H                | CH <sub>3</sub> | H  | 76-78   | b   | 72  |
| <b>10q</b> | F                              | F               | H                | H               | H  | oil     | oil | 81  |
| <b>10r</b> | F                              | H               | F                | H               | H  | 63-65   | c   | 28  |
| <b>10s</b> | F                              | H               | H                | F               | H  | oil     | oil | 72  |
| <b>10t</b> | F                              | H               | H                | H               | F  | 86-88   | a   | 100 |
| <b>10u</b> | H                              | F               | F                | H               | H  | oil     | oil | 87  |
| <b>10v</b> | H                              | F               | H                | F               | H  | 62-64   | c   | 35  |
| <b>10w</b> | Cl                             | H               | Cl               | H               | H  | 88-90   | c   | 58  |
| <b>10x</b> | Cl                             | H               | H                | H               | Cl | 89-90   | c   | 47  |
| <b>10y</b> | H                              | Cl              | H                | Cl              | H  | 75-77   | a   | 85  |

<sup>a</sup> Recrystallization solvent: (a) ligroin; (b) *n*-hexane; (c) cyclohexane

### 3. Analysis

| Compd     | Elemental Analyses Calculated/ Found |      |      |    |   |
|-----------|--------------------------------------|------|------|----|---|
|           | C                                    | H    | N    | Cl | F |
| <b>7a</b> | 70.13                                | 5.89 | 4.31 |    |   |
|           | 70.29                                | 5.97 | 4.10 |    |   |
| <b>7b</b> | 70.77                                | 6.24 | 4.13 |    |   |
|           | 70.78                                | 6.21 | 4.01 |    |   |
| <b>7c</b> | 70.77                                | 6.24 | 4.13 |    |   |
|           | 70.53                                | 6.34 | 4.31 |    |   |

|           |       |      |      |       |
|-----------|-------|------|------|-------|
| <b>7d</b> | 70.77 | 6.24 | 4.13 |       |
|           | 70.49 | 6.21 | 4.18 |       |
| <b>7e</b> | 66.45 | 5.29 | 4.08 | 5.54  |
|           | 66.20 | 5.25 | 4.39 | 5.69  |
| <b>7f</b> | 66.45 | 5.29 | 4.08 | 5.54  |
|           | 66.51 | 5.25 | 4.03 | 5.50  |
| <b>7g</b> | 66.45 | 5.29 | 4.08 | 5.54  |
|           | 66.40 | 5.39 | 4.01 | 5.50  |
| <b>7h</b> | 63.41 | 5.04 | 3.89 | 9.86  |
|           | 63.65 | 5.08 | 3.87 | 9.90  |
| <b>7i</b> | 63.41 | 5.04 | 3.89 | 9.86  |
|           | 63.55 | 5.08 | 3.96 | 9.77  |
| <b>7j</b> | 68.55 | 5.18 | 8.00 |       |
|           | 68.35 | 5.36 | 7.95 |       |
| <b>7k</b> | 68.55 | 5.18 | 8.00 |       |
|           | 68.50 | 5.20 | 7.99 |       |
| <b>7l</b> | 68.55 | 5.18 | 8.00 |       |
|           | 68.69 | 5.13 | 8.18 |       |
| <b>7m</b> | 67.58 | 5.96 | 3.94 |       |
|           | 67.61 | 5.93 | 3.80 |       |
| <b>7n</b> | 67.58 | 5.96 | 3.94 |       |
|           | 67.53 | 6.17 | 4.11 |       |
| <b>7o</b> | 68.26 | 6.28 | 3.79 |       |
|           | 68.53 | 6.99 | 3.70 |       |
| <b>7p</b> | 71.36 | 6.56 | 3.97 |       |
|           | 71.10 | 6.66 | 3.80 |       |
| <b>7q</b> | 63.14 | 4.74 | 3.88 | 10.52 |

|           |       |      |      |       |       |
|-----------|-------|------|------|-------|-------|
|           | 63.21 | 4.79 | 3.63 |       | 10.47 |
| <b>7r</b> | 63.14 | 4.74 | 3.88 |       | 10.52 |
|           | 63.22 | 4.58 | 3.83 |       | 10.64 |
| <b>7s</b> | 63.14 | 4.74 | 3.88 |       | 10.52 |
|           | 63.28 | 4.64 | 3.62 |       | 10.55 |
| <b>7t</b> | 63.14 | 4.74 | 3.88 |       | 10.52 |
|           | 63.09 | 4.58 | 4.05 |       | 10.64 |
| <b>7u</b> | 63.14 | 4.74 | 3.88 |       | 10.52 |
|           | 63.13 | 4.61 | 3.74 |       | 10.50 |
| <b>7v</b> | 63.14 | 4.74 | 3.88 |       | 10.52 |
|           | 63.19 | 4.56 | 3.75 |       | 10.51 |
| <b>7w</b> | 57.86 | 4.35 | 3.55 | 18.00 |       |
|           | 57.62 | 4.25 | 3.46 | 17.89 |       |
| <b>7x</b> | 57.86 | 4.35 | 3.55 | 18.00 |       |
|           | 57.71 | 4.55 | 3.89 | 18.10 |       |
| <b>7y</b> | 57.86 | 4.35 | 3.55 | 18.00 |       |
|           | 57.89 | 4.08 | 3.60 | 17.95 |       |
| <b>8a</b> | 68.66 | 5.09 | 4.71 |       |       |
|           | 68.40 | 4.78 | 4.76 |       |       |
| <b>8b</b> | 69.43 | 5.51 | 4.50 |       |       |
|           | 69.53 | 5.64 | 4.59 |       |       |
| <b>8c</b> | 69.43 | 5.51 | 4.50 |       |       |
|           | 69.40 | 5.57 | 4.51 |       |       |
| <b>8d</b> | 69.43 | 5.51 | 4.50 |       |       |
|           | 69.41 | 5.51 | 4.56 |       |       |
| <b>8e</b> | 64.74 | 4.48 | 4.44 |       | 6.03  |
|           | 64.90 | 4.53 | 4.50 |       | 7.79  |

|           |       |      |      |       |
|-----------|-------|------|------|-------|
| <b>8f</b> | 64.74 | 4.48 | 4.44 | 6.03  |
|           | 64.70 | 4.51 | 4.49 | 6.99  |
| <b>8g</b> | 64.74 | 4.48 | 4.44 | 6.03  |
|           | 65.00 | 4.51 | 4.68 | 6.10  |
| <b>8h</b> | 61.53 | 4.26 | 4.22 | 10.69 |
|           | 61.46 | 4.30 | 4.18 | 10.73 |
| <b>8i</b> | 61.53 | 4.26 | 4.22 | 10.69 |
|           | 61.70 | 4.33 | 4.41 | 10.66 |
| <b>8j</b> | 67.06 | 4.38 | 8.69 |       |
|           | 67.07 | 4.24 | 8.72 |       |
| <b>8k</b> | 67.06 | 4.38 | 8.69 |       |
|           | 66.91 | 4.30 | 8.71 |       |
| <b>8l</b> | 67.06 | 4.38 | 8.69 |       |
|           | 67.10 | 4.40 | 8.71 |       |
| <b>8m</b> | 66.03 | 5.24 | 4.28 |       |
|           | 65.85 | 5.12 | 4.31 |       |
| <b>8n</b> | 66.03 | 5.24 | 4.28 |       |
|           | 65.90 | 5.21 | 4.28 |       |
| <b>8o</b> | 66.84 | 5.61 | 4.10 |       |
|           | 66.76 | 5.93 | 3.98 |       |
| <b>8p</b> | 70.13 | 5.89 | 4.31 |       |
|           | 70.03 | 5.92 | 4.54 |       |
| <b>8q</b> | 64.95 | 4.17 | 4.46 | 6.05  |
|           | 65.00 | 4.12 | 4.51 | 6.10  |
| <b>8r</b> | 64.95 | 4.17 | 4.46 | 6.05  |
|           | 65.01 | 4.13 | 4.52 | 5.99  |
| <b>8s</b> | 64.95 | 4.17 | 4.46 | 6.05  |
|           | 64.87 | 4.20 | 4.57 | 6.07  |
| <b>8t</b> | 64.95 | 4.17 | 4.46 | 6.05  |



|           |       |      |      |       |      |
|-----------|-------|------|------|-------|------|
|           | 65.01 | 4.22 | 4.40 |       | 6.16 |
| <b>8u</b> | 64.95 | 4.17 | 4.46 |       | 6.05 |
|           | 64.88 | 4.18 | 4.50 |       | 6.03 |
| <b>8v</b> | 64.95 | 4.17 | 4.46 |       | 6.05 |
|           | 65.11 | 4.17 | 4.44 |       | 6.12 |
| <b>8w</b> | 61.72 | 3.96 | 4.24 | 10.73 |      |
|           | 61.54 | 3.98 | 4.22 | 10.70 |      |
| <b>8x</b> | 61.72 | 3.96 | 4.24 | 10.73 |      |
|           | 61.70 | 4.04 | 4.23 | 10.75 |      |
| <b>8y</b> | 61.72 | 3.96 | 4.24 | 10.73 |      |
|           | 61.54 | 3.99 | 4.32 | 10.77 |      |
